# Supplementary material for: Bayesian optimization of the conditions for highly sensitive detection of surface contamination by laser-induced breakdown spectroscopy
Source: Royal Society of Chemistry journal article supplement (doi:10.1039/d3ja00195d), 2023-01-01
Supplement: d3ja00195d1.pdf [file d3ja00195d1.pdf]

## Electronic Supporting Information

# Bayesian optimization of the conditions for highly sensitive detection of surface contamination by laser-induced breakdown spectroscopy

Tadatake Sato, Kenichi Tashiro, Yoshizo Kawaguchi, Hideki Ohmura, Haruhisa Akiyama

National Institute of Advanced Industrial Science and Technology (AIST), 1-1-1 Umezono, Tsukuba, Ibaraki 305-3568, Japan

### Evaluation of surface concentrations

Samples coated with thin silicone oil layer was prepared by spraying system described in ref. 9. The amount of adhered silicone oil was evaluated from peak intensity of the IR band at  $1266\text{ cm}^{-1}$  based on the linear relationship between peak intensity and surface concentration shown in Fig. S1 and Table S1. The amount of adhered silicone oil was weighed using a electric balance (Mettler Toredco Co., AG285).

Table S1. Weight of adhered silicone oil and IR peak intensity

| Weight of adhered silicone oil (mg) | Calculated surface concentration ( $\mu\text{g cm}^{-2}$ ) | Peak intensity of IR band at $1266\text{ cm}^{-1}$ |
|-------------------------------------|------------------------------------------------------------|----------------------------------------------------|
| 0.134                               | 7.42                                                       | 0.213                                              |
| 0.208                               | 11.52                                                      | 0.276                                              |
| 0.268                               | 14.84                                                      | 0.430                                              |
| 0.278                               | 15.39                                                      | 0.444                                              |
| 0.152                               | 8.42                                                       | 0.237                                              |
| 0.172                               | 9.52                                                       | 0.295                                              |
| 0.308                               | 17.05                                                      | 0.433                                              |
| 0.344                               | 19.04                                                      | 0.509                                              |
| 0.148                               | 8.19                                                       | 0.225                                              |
| 0.220                               | 12.18                                                      | 0.320                                              |
| 0.288                               | 15.94                                                      | 0.425                                              |
| 0.316                               | 17.49                                                      | 0.487                                              |
| 0.116                               | 6.43                                                       | 0.180                                              |
| 0.162                               | 8.97                                                       | 0.241                                              |
| 0.226                               | 12.51                                                      | 0.359                                              |
| 0.312                               | 17.27                                                      | 0.473                                              |

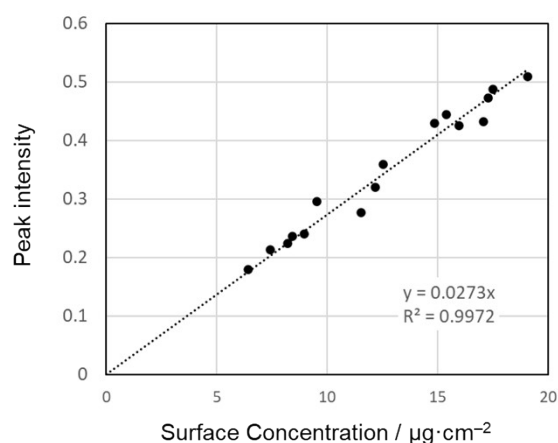

Fig. S1. Linear relationship between the IR band peak intensity at  $1266\text{ cm}^{-1}$  and the surface concentration calculated from weight of adhered silicone oil.

## Spot size and fluences

Spot size at various sZ was estimated from the etched structures formed by irradiation at 8.0mJ with 30 pulses. The generated structures were evaluated by laser confocal microscope (Keyence, VK-X1000). The long and short diameters of etched part are summarized in Table S2.

Table S2. Estimated spot size and fluences.

| sZ    | long diameter / $\mu\text{m}$ | short diameter / $\mu\text{m}$ | Area / $\text{cm}^2$ | Fluence / $\text{J cm}^{-2}$ |        |        |        |        |        |        |        |
|-------|-------------------------------|--------------------------------|----------------------|------------------------------|--------|--------|--------|--------|--------|--------|--------|
|       |                               |                                |                      | PE=8mJ                       | PE=7mJ | PE=6mJ | PE=5mJ | PE=4mJ | PE=3mJ | PE=2mJ | PE=1mJ |
| 6.50  | 478.7                         | 331.9                          | 0.0012478            | 6.41                         | 5.61   | 4.81   | 4.01   | 3.21   | 2.40   | 1.60   | 0.80   |
| 7.00  | 426.1                         | 309.7                          | 0.0010364            | 7.72                         | 6.75   | 5.79   | 4.82   | 3.86   | 2.89   | 1.93   | 0.96   |
| 7.50  | 376.0                         | 244.1                          | 0.0007209            | 11.10                        | 9.71   | 8.32   | 6.94   | 5.55   | 4.16   | 2.77   | 1.39   |
| 8.00  | 326.3                         | 210.7                          | 0.0005400            | 14.81                        | 12.96  | 11.11  | 9.26   | 7.41   | 5.56   | 3.70   | 1.85   |
| 8.50  | 286.6                         | 193.2                          | 0.0004348            | 18.40                        | 16.10  | 13.80  | 11.50  | 9.20   | 6.90   | 4.60   | 2.30   |
| 8.75  | 253.1                         | 179.9                          | 0.0003575            | 22.37                        | 19.58  | 16.78  | 13.98  | 11.19  | 8.39   | 5.59   | 2.80   |
| 9.00  | 230.4                         | 172.6                          | 0.0003122            | 25.62                        | 22.42  | 19.22  | 16.01  | 12.81  | 9.61   | 6.41   | 3.20   |
| 9.25  | 216.9                         | 162.7                          | 0.0002772            | 28.86                        | 25.25  | 21.65  | 18.04  | 14.43  | 10.82  | 7.22   | 3.61   |
| 9.50  | 206.8                         | 131.1                          | 0.0002130            | 37.55                        | 32.86  | 28.16  | 23.47  | 18.78  | 14.08  | 9.39   | 4.69   |
| 9.75  | 179.1                         | 127.8                          | 0.0001798            | 44.50                        | 38.93  | 33.37  | 27.81  | 22.25  | 16.69  | 11.12  | 5.56   |
| 10.00 | 161.0                         | 131.5                          | 0.0001663            | 48.11                        | 42.10  | 36.09  | 30.07  | 24.06  | 18.04  | 12.03  | 6.01   |
| 10.25 | 143.6                         | 130.9                          | 0.0001477            | 54.17                        | 47.40  | 40.63  | 33.86  | 27.09  | 20.31  | 13.54  | 6.77   |
| 10.50 | 144.4                         | 133.5                          | 0.0001514            | 52.83                        | 46.23  | 39.62  | 33.02  | 26.41  | 19.81  | 13.21  | 6.60   |
| 10.75 | 173.3                         | 139.4                          | 0.0001897            | 42.17                        | 36.90  | 31.63  | 26.36  | 21.09  | 15.81  | 10.54  | 5.27   |
| 11.00 | 192.8                         | 141.9                          | 0.0002150            | 37.22                        | 32.56  | 27.91  | 23.26  | 18.61  | 13.96  | 9.30   | 4.65   |
| 11.50 | 213.8                         | 164.8                          | 0.0002768            | 28.91                        | 25.29  | 21.68  | 18.07  | 14.45  | 10.84  | 7.23   | 3.61   |
| 12.00 | 253.0                         | 195.6                          | 0.0003886            | 20.58                        | 18.01  | 15.44  | 12.87  | 10.29  | 7.72   | 5.15   | 2.57   |
| 12.50 | 278.5                         | 241.4                          | 0.0005280            | 15.15                        | 13.26  | 11.36  | 9.47   | 7.58   | 5.68   | 3.79   | 1.89   |
| 13.00 | 340.4                         | 278.3                          | 0.0007439            | 10.75                        | 9.41   | 8.07   | 6.72   | 5.38   | 4.03   | 2.69   | 1.34   |
| 13.50 | 401.0                         | 319.3                          | 0.0010056            | 7.96                         | 6.96   | 5.97   | 4.97   | 3.98   | 2.98   | 1.99   | 0.99   |
| 14.00 | 434.7                         | 362.2                          | 0.0012366            | 6.47                         | 5.66   | 4.85   | 4.04   | 3.23   | 2.43   | 1.62   | 0.81   |

## Details of Bayesian optimization process

The initial 40 conditions generated by Latin hyper cube sampling and the conditions employed in subsequent rounds are listed in Table S3. The numbers in parentheses denote the number of repeated experiments. These conditions were generated by a GPR model trained using the experimental results. In each round, the trained model was examined by plotting the correlation between the actual experimental results (r-LOD values) and the values predicted by the model. The results are summarized in Fig. S2 and the optimized kernel hyperparameters.

Table S3. Grid indices of experimental conditions until 10th round. The numbers in parentheses are the numbers of experiments

| 1st round |     |      |      | 2nd    | 3rd | 4th  | 5th | 6th | 7th    | 8th    | 9th    | 10th  |
|-----------|-----|------|------|--------|-----|------|-----|-----|--------|--------|--------|-------|
| 85        | 602 | 1117 | 1564 | 120(2) | 770 | 1327 | 185 | 402 | 140    | 121    | 61     | 52    |
| 120       | 619 | 1149 | 1575 | 119    | 769 | 384  | 16  | 582 | 122    | 130    | 787    | 70    |
| 280       | 642 | 1163 | 1671 | 129    | 590 | 761  | 392 | 131 | 132    | 113    | 121(2) | 62    |
| 297       | 766 | 1193 | 1683 | 128    | 778 | 950  | 391 | 393 | 149    | 112    | 122(3) | 79    |
| 315       | 767 | 1325 | 1752 | 111    | 581 | 291  | 92  | 573 | 131(2) | 122(2) | 131(3) | 61(2) |
| 396       | 820 | 1341 | 1867 |        |     |      |     |     |        |        |        |       |
| 401       | 828 | 1382 | 1886 |        |     |      |     |     |        |        |        |       |
| 458       | 957 | 1388 | 1911 |        |     |      |     |     |        |        |        |       |
| 486       | 959 | 1512 | 1915 |        |     |      |     |     |        |        |        |       |
| 498       | 978 | 1530 | 2074 |        |     |      |     |     |        |        |        |       |

|                                                           |                                                                                     |                                                                                      |                                                                                       |
|-----------------------------------------------------------|-------------------------------------------------------------------------------------|--------------------------------------------------------------------------------------|---------------------------------------------------------------------------------------|
|                                                           | Training at the 1st round;<br>preparation for 2nd round                             | Training at the 2nd round;<br>preparation for 3rd round                              | Training at the 3rd round;<br>preparation for 4th round                               |
|                                                           | 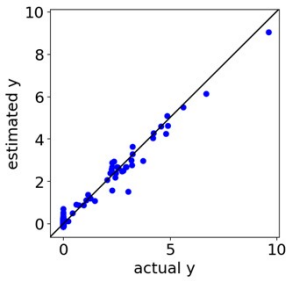   |    |    |
| Setting of noise level bounds<br>(upper and lower bounds) | (0.1, 0.5)                                                                          | (0.1, 0.5)                                                                           | (0.1, 0.5)                                                                            |
| Log-Marginal-Likelihood                                   | -185.749                                                                            | -198.892                                                                             | -210.752                                                                              |
| R <sup>2</sup> fro the trained data                       | 0.97769                                                                             | 0.96006                                                                              | 0.95100                                                                               |
| length scale                                              | 0.714                                                                               | 0.709                                                                                | 0.7                                                                                   |
| noise level                                               | 0.1                                                                                 | 0.1                                                                                  | 0.1                                                                                   |
|                                                           | Training at the 4th round;<br>preparation for 5th round                             | Training at the 5th round;<br>preparation for 6th round                              | Training at the 6th round;<br>preparation for 7th round                               |
|                                                           |   |   |   |
| Setting of noise level bounds<br>(upper and lower bounds) | (0.1, 0.5)                                                                          | (0.02, 0.5)                                                                          | (0.02, 0.5)                                                                           |
| Log-Marginal-Likelihood                                   | -234.082                                                                            | -235.653                                                                             | -228.600                                                                              |
| R <sup>2</sup> fro the trained data                       | 0.91395                                                                             | 0.92122                                                                              | 0.92473                                                                               |
| length scale                                              | 0.875                                                                               | 0.805                                                                                | 0.841                                                                                 |
| noise level                                               | 0.103                                                                               | 0.0965                                                                               | 0.0919                                                                                |
|                                                           | Training at the 7th round;<br>preparation for 8th round                             | Training at the 8th round;<br>preparation for 9th round                              | Training at the 9th round;<br>preparation for 10th round                              |
|                                                           |  |  |  |
| Setting of noise level bounds<br>(upper and lower bounds) | (0.02, 0.5)                                                                         | (0.02, 0.5)                                                                          | (0.02, 0.5)                                                                           |
| Log-Marginal-Likelihood                                   | -218.904                                                                            | -213.270                                                                             | -206.169                                                                              |
| R <sup>2</sup> fro the trained data                       | 0.92546                                                                             | 0.92337                                                                              | 0.93033                                                                               |
| length scale                                              | 0.831                                                                               | 0.863                                                                                | 0.853                                                                                 |
| noise level                                               | 0.0903                                                                              | 0.0913                                                                               | 0.0842                                                                                |

Fig. S2. The correlation between the actual r-LOD values and those predicted by the GPR model and optimized kernel hyperparameters at each round of Bayesian optimization.

The experimental conditions with PE of 7.0 and 7.5 mJ employed until the 10th round are shown in Table S4. In these conditions, the conditions with sZ around 8.25 or 12.75 mm and dZ = -0.5 – +0.5 mm were not included. The largest r-LOD was 5.622 obtained with grid index of 401.

Table S4. The conditions with PE = 7.0 and 7.5mJ examined until the 10th round

| Grid index | PE (mJ) | sZ (mm) | dZ (mm) | r-LOD (cm <sup>2</sup> ·μg <sup>-1</sup> ) | No. of exp. (Round of exp.) |
|------------|---------|---------|---------|--------------------------------------------|-----------------------------|
| 185        | 7.5     | 5.75    | 0.5     | 2.017                                      | 1(5)                        |
| 280        | 7.5     | 11.25   | -1.5    | 4.580                                      | 1(1)                        |
| 291        | 7.5     | 11.75   | -0.5    | 3.390                                      | 1(4)                        |
| 297        | 7.5     | 12.25   | -2.0    | 2.503                                      | 1(1)                        |
| 315        | 7.5     | 13.25   | -2.0    | 2.942                                      | 1(1)                        |
| 384        | 7.0     | 6.75    | 1.0     | 5.465                                      | 1(4)                        |
| 391        | 7.0     | 7.25    | 0.0     | 2.176                                      | 1(5)                        |
| 392        | 7.0     | 7.25    | 0.5     | 4.611                                      | 1(5)                        |
| 393        | 7.0     | 7.25    | 1.0     | 3.789                                      | 1(6)                        |
| 396        | 7.0     | 7.75    | -2.0    | 2.450                                      | 1(1)                        |
| 401        | 7.0     | 7.75    | 0.5     | 5.622                                      | 1(1)                        |
| 402        | 7.0     | 7.75    | 1.0     | 5.461                                      | 1(6)                        |
| 458        | 7.0     | 10.75   | 2.0     | 1.059                                      | 1(1)                        |
| 486        | 7.0     | 12.75   | -2.0    | 2.206                                      | 1(1)                        |
| 498        | 7.0     | 13.25   | -0.5    | 3.242                                      | 1(1)                        |

### Selection of 13 conditions for 11th round

The conditions for the 11th round were manually selected based on the following criteria: (1) the conditions that showed the top 10 largest r-LODs in one experiment (grid indices:770, 111, 581, 959, 787, and 128), and (2) the conditions near these conditions showing low r-LOD. Three conditions with grid indices of 761, 591, and 950 were selected as shown in Fig. S3, where the distance  $|x_i - x_j|$  is evaluated using autoscaled values. (3) the conditions with PE of 7.0 and 7.5 mJ with sZ around 8.25 or 12.75 mm and dZ = +0.5 mm: four conditions listed in Table S5 were selected. Thus, 13 conditions were selected for the experiments in the 11th round.

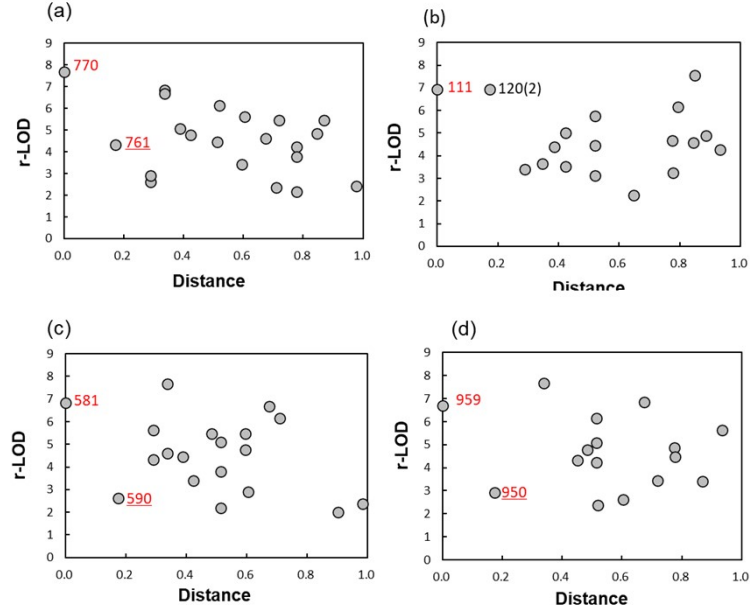

Fig. S3. r-LOD vs. distance  $|\mathbf{x}_i - \mathbf{x}_j|$  from the conditions with grid indices of (a) 770, (b) 111, (c) 581, and (d) 959.

Table S5. Four conditions with PE of 7.0 and 7.5mJ for 11th round of experiment

| Grid index | PE (mJ) | sZ (mm) | dZ (mm) |
|------------|---------|---------|---------|
| 302        | 7.5     | 12.25   | 0.5     |
| 482        | 7.0     | 12.25   | 0.5     |
| 239        | 7.5     | 8.75    | 0.5     |
| 419        | 7.0     | 8.75    | 0.5     |

The grid indices of the conditions employed from 11th to 16th rounds are listed in Table S6. From the experimental results obtained in each round, the top 10 largest r-LOD values are listed in Table S7 together with the grid indices of the conditions. From the experiments in the 11th round, three conditions with 959, 787, and 128 disappeared from the table, whereas the r-LOD values of three conditions were corrected as follows: 7.678 to 6.592 (grid index: 770), 6.929 to 6.506 (grid index: 111), 6.841 to 5.233 (grid index: 581). The conditions for the 12th round were generated using the GPR model, which was trained by adding the experimental results obtained from the 11th round.

Table S6. Grid indices of experimental conditions employed at the 11th ~ 16th round. The number in

parentheses are that of repeated experiments. The numbers in bold style indicates the manually selected conditions.

| 11th          |               | 12th   | 13th          | 14th          | 15th          | 16th   |
|---------------|---------------|--------|---------------|---------------|---------------|--------|
| <b>302</b>    | <b>787(2)</b> | 1527   | 130(3)        | 112(2)        | 113(2)        | 614    |
| <b>482</b>    | <b>950(2)</b> | 222    | 139           | 411           | 778(2)        | 1131   |
| <b>239</b>    | <b>959(2)</b> | 121(3) | 967           | 120(3)        | 140(2)        | 441    |
| <b>419</b>    |               | 130(2) | <b>401(2)</b> | <b>402(2)</b> | <b>419(2)</b> | 840    |
| <b>111(2)</b> |               | 131(4) | <b>384(2)</b> | <b>61(3)</b>  | <b>770(3)</b> | 140(3) |
| <b>128(2)</b> |               |        |               |               |               |        |
| <b>581(2)</b> |               |        |               |               |               |        |
| <b>590(2)</b> |               |        |               |               |               |        |
| <b>761(2)</b> |               |        |               |               |               |        |
| <b>770(2)</b> |               |        |               |               |               |        |

TableS7. Top 10 conditions showing the largest r-LOD at the 10th ~ 16th round

| Round10    |       | Round11    |       | Round12    |       | Round13    |       |
|------------|-------|------------|-------|------------|-------|------------|-------|
| Grid index | r-LOD |
| 770        | 7.678 | 131(3)     | 7.542 | 61(2)      | 7.019 | 61(2)      | 7.019 |
| 131(3)     | 7.542 | 61(2)      | 7.019 | 120(2)     | 6.929 | 120(2)     | 6.929 |
| 61(2)      | 7.019 | 120(2)     | 6.929 | 131(4)     | 6.617 | 131(4)     | 6.617 |
| 111        | 6.944 | 770(2)     | 6.592 | 770(2)     | 6.592 | 770(2)     | 6.592 |
| 120(2)     | 6.929 | 111(2)     | 6.506 | 111(2)     | 6.506 | 111(2)     | 6.506 |
| 581        | 6.841 | 122(3)     | 6.159 | 122(3)     | 6.159 | 122(3)     | 6.159 |
| 959        | 6.685 | 401        | 5.622 | 401        | 5.622 | 402        | 5.461 |
| 122(3)     | 6.159 | 384        | 5.465 | 384        | 5.465 | 401(2)     | 5.375 |
| 787        | 6.147 | 402        | 5.461 | 402        | 5.461 | 121(3)     | 5.333 |
| 128        | 5.761 | 581(2)     | 5.233 | 121(3)     | 5.333 | 581(2)     | 5.233 |

  

| Round14    |       | Round15    |       | Round16    |       |
|------------|-------|------------|-------|------------|-------|
| Grid index | r-LOD | Grid index | r-LOD | Grid index | r-LOD |
| 131(4)     | 6.617 | 131(4)     | 6.617 | 131(4)     | 6.617 |
| 770(2)     | 6.592 | 111(2)     | 6.506 | 111(2)     | 6.506 |
| 111(2)     | 6.506 | 120(3)     | 6.440 | 120(3)     | 6.440 |
| 120(3)     | 6.440 | 61(3)      | 6.302 | 61(3)      | 6.302 |
| 61(3)      | 6.302 | 122(3)     | 6.159 | 122(3)     | 6.159 |
| 122(3)     | 6.159 | 140(2)     | 5.814 | 401(2)     | 5.375 |
| 401(2)     | 5.375 | 401(2)     | 5.375 | 121(3)     | 5.333 |
| 121(3)     | 5.333 | 121(3)     | 5.333 | 770(3)     | 5.254 |
| 581(2)     | 5.233 | 770(3)     | 5.254 | 581(2)     | 5.233 |
| 419        | 5.202 | 581(2)     | 5.233 | 402(2)     | 5.172 |

The GPR model trained using the results of the 12th round yielded the five conditions as follows: grid

indices of 130(2), 121(3), 139(0), 967(0), and 131(4), for the 13th round. The numbers in parentheses denotes the number of experiments conducted until the 12th round. Although multiple experiments are effective in correcting the variation, the conditions showing the top 10 largest r-LOD in the 12th round still include three conditions (grid indices:401, 384, and 402) under which only one experiment had been performed. Therefore, among the conditions given by the GPR model, those with grid indices of 121 and 131, experiments had been performed three and four times, respectively, were replaced by those with the grid indices of 401 and 384. For the 14th round, the conditions with grid indices of 402 and 61 were selected from those showing the top 10 largest r-LODs, in addition to the three conditions given by the GPR model (grid indices of 121, 130, and 131). For the 15th round, conditions with grid indices of 419 and 770 were selected, in addition to the three conditions given by the GPR model. After the 15th round of experiments, all conditions showing the top 10 largest LODs were the results of multiple experiments. Among these, two results from the 15th round were included (grid indices of 140 and 770). Moreover, by adding the results at the 15th round, the GPR model showed significant changes in hyperparameters and correlation between the actual and predicted values (Fig. S4). Therefore, successive round of experiments were executed. Whereas the five conditions employed in the 15th round were those for multiple experiments, the five conditions for the 16th round given by the GPR model included four conditions for the first experiment. In the 16th round, r-LOD values greater than 5.109 were not obtained. Therefore, the top 10 conditions with the largest r-LOD did not include the experimental results obtained in the 16th round. Thus, we terminated the optimization in this round.



|                                                           | Training at the 11th round;<br>preparation for 12th round                          | Training at the 12th round;<br>preparation for 13th round                           | Training at the 13th round;<br>preparation for 14th round                           |
|-----------------------------------------------------------|------------------------------------------------------------------------------------|-------------------------------------------------------------------------------------|-------------------------------------------------------------------------------------|
|                                                           | 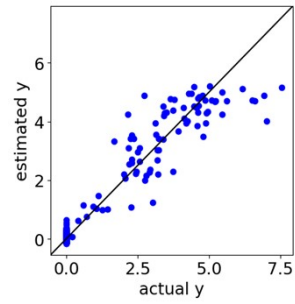  |   |  |
| Setting of noise level bounds<br>(upper and lower bounds) | (0.02, 0.5)                                                                        | (0.02, 0.5)                                                                         | (0.02, 0.5)                                                                         |
| Log-Marginal-Likelihood                                   | -203.641                                                                           | -197.484                                                                            | -197.021                                                                            |
| R <sup>2</sup> fro the trained data                       | 0.92895                                                                            | 0.92425                                                                             | 0.92647                                                                             |
| length scale                                              | 0.850                                                                              | 0.950                                                                               | 0.903                                                                               |
| noise level                                               | 0.0851                                                                             | 0.0881                                                                              | 0.0863                                                                              |
|                                                           | Training at the 14th round;<br>preparation for 15th round                          | Training at the 15th round;<br>preparation for 16th round                           |                                                                                     |
|                                                           |  |  |                                                                                     |
| Setting of noise level bounds<br>(upper and lower bounds) | (0.02, 0.5)                                                                        | (0.02, 0.5)                                                                         |                                                                                     |
| Log-Marginal-Likelihood                                   | -184.272                                                                           | -171583                                                                             |                                                                                     |
| R <sup>2</sup> fro the trained data                       | 0.93172                                                                            | 0.97353                                                                             |                                                                                     |
| length scale                                              | 0.891                                                                              | 0.544                                                                               |                                                                                     |
| noise level                                               | 0.0806                                                                             | 0.0412                                                                              |                                                                                     |

Fig. S4. The correlation between the actual values and the values predicted by the trained model and the parameters at each round of Bayesian optimization (11th ~ 15th round).

## Effect of air breakdown

The lowest LOD was obtained for LIBS measurements below the focal point. Generally, LIBS measurements with irradiation below the focal point are avoided to eliminate the effect of air breakdown. The luminescence of air breakdown was observed upon laser irradiation without samples at the focal point with a PE of 6.0–8.0 mJ. However, the luminescence of the air breakdown was much dimmer than the light emission in the LIBS measurements, and could not be detected by the present

system. This was due to low PE. Chen et al. reported the threshold energy for detecting emission is 11 mJ for the fundamental pulse of an Nd:YAG laser (Y. -L. Chen, et. al., *J. Quant. Spectrosc. Radiat. Transf.*, 2000, **67**, 91–103.). The emission spectra of air breakdown showing peaks of N at 742.36, 744.23, and 746.83 nm, and those of O at 777.19, 777.42, and 777.54 nm were obtained with double-pulse bursts with a total pulse energy of 230 mJ (V. Sturm and R. Noll, *Appl. Opt.*, 2003, **42**, 6221–6225.). Fig. S5 shows that the LIBS spectra obtained above and below the focal point are almost identical. Although O and N peaks were detected, their intensities under the two conditions were similar. Therefore, they were derived from the atomic species excited in the plasma of the ablated substrate and not from air breakdown. Thus, the direct effect of air breakdown was not observed in the spectra. Considering that the PE of the conditions above and below the focal points were different, different spatial distributions of the laser light may cause different plasma heating. Further investigation is necessary to confirm this hypothesis.

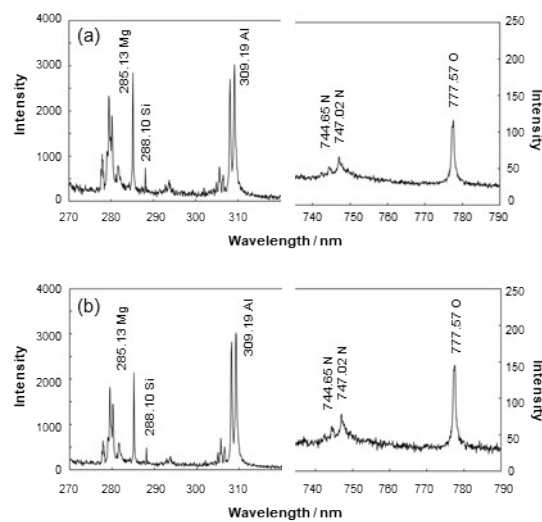

Fig. S5. LIBS spectra obtained under the conditions (a) above and (b) below the focal points.
